# Supplementary material for: Self-administration of adrenaline for anaphylaxis during in-hospital food challenges improves health-related quality of life
Source: PubMed Central journal article supplement (PMC8142442; doi:10.1136/archdischild-2020-319906), 2020-09-18

## Supplementary Figures

Figure S1: CONSORT diagram

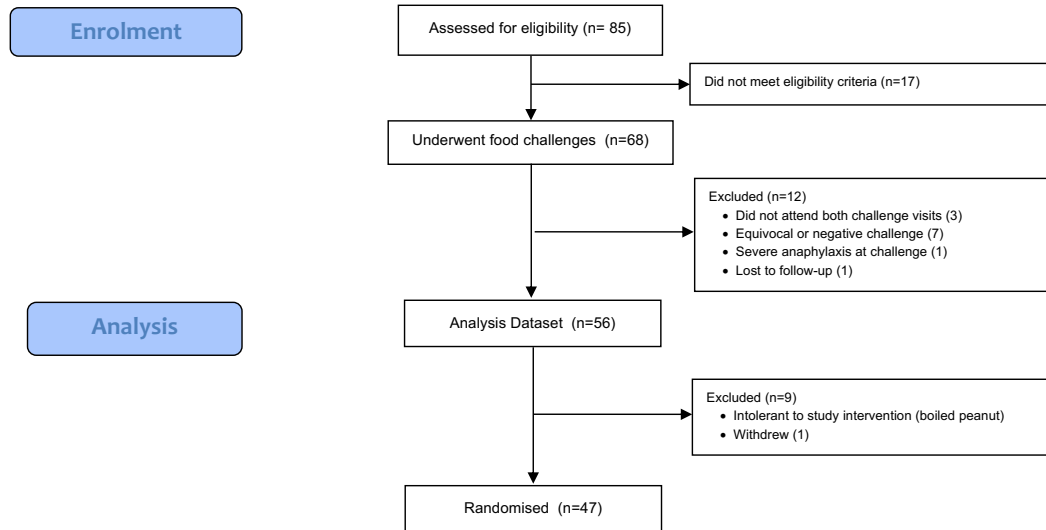

**Figure S2: Change in HRQL and self-efficacy score reported by participants their parents, between the challenge and 12 months later.**

FAQLQ-YP, HRQL in the young person; FAQLQ-parent, parent proxy report;

FAQLQ-PB, HRQL in the parent.

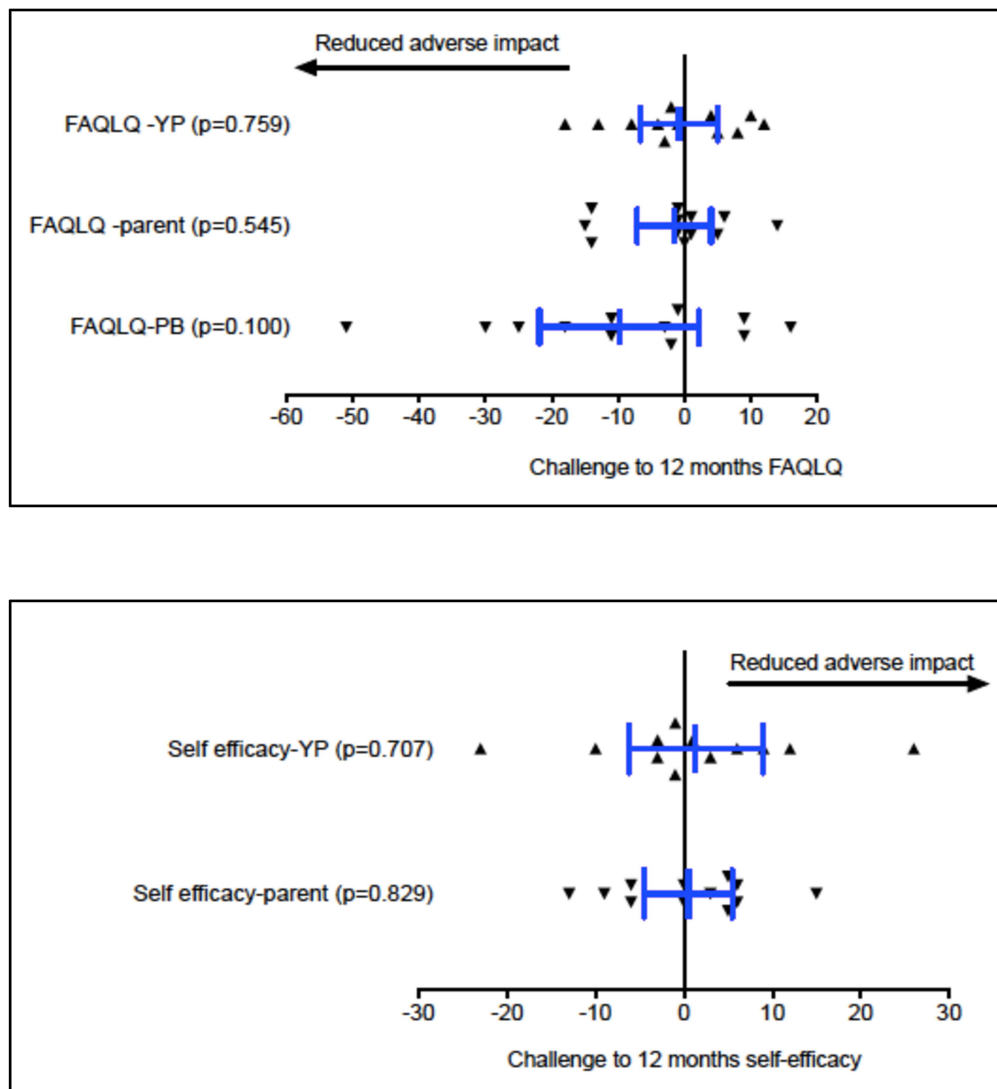

Supplement: archdischild-2020-319906supp001.pdf [file archdischild-2020-319906supp001.pdf]
